# Supplementary material for: Extensive Collection of Psychotropic Mushrooms with Determination of Their Tryptamine Alkaloids
Source: MDPI journal article supplement (doi:10.3390/ijms232214068), 2022-11-15
Supplement: s1 [file s1]

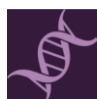

**Supplementary Table S1.** Data on analyzed mushroom collections.

| ID    | Mushroom species                              | Coll.Date* | Origin                 | Fungarium ID        | GenBank            | Analysis   |
|-------|-----------------------------------------------|------------|------------------------|---------------------|--------------------|------------|
| PS-01 | <i>Panaeolus foenisecii</i>                   | 14.06.2015 | Czech Republic         | PRM 934273          | n.a.               | May 2016   |
| PS-02 | <i>Panaeolus cinctulus</i> cf.                | 24.05.2015 | Italy                  | PRM 934316          | MW352022           | May 2016   |
| PS-03 | <i>Panaeolus cinctulus</i>                    | 09.05.2015 | Czech Republic         | PRM 934317          | n.a.               | May 2016   |
| PS-04 | <i>Psilocybe subaeruginosa</i>                | 12.07.2015 | Tasmania               | PRM 934325          | n.a.               | May 2016   |
| PS-05 | <i>Panaeolus papilionaceus</i>                | 30.09.2015 | Czech Republic         | (PRM 934907)        | n.a.               | May 2016   |
| PS-06 | <i>Panaeolus olivaceus</i>                    | 10.10.2015 | Czech Republic         | PRM 935914          | MW352021           | May 2016   |
| PS-07 | <i>Psilocybe medullosa</i>                    | 10.10.2015 | Czech Republic         | PRM 934921          | n.a.               | May 2016   |
| PS-08 | <i>Inocybe calamistrata</i>                   | 22.09.2015 | Czech Republic         | HR 97960            | n.a.               | May 2016   |
| PS-09 | <i>Psilocybe serbica</i> var. <i>bohemica</i> | 08.11.2015 | Czech Republic         | (PRM 923899)        | n.a.               | May 2016   |
| PS-10 | <i>Psilocybe cyanescens</i>                   | 08.11.2015 | Czech Republic         | (PRM 923257)        | n.a.               | May 2016   |
| PS-11 | <i>Psilocybe serbica</i> var. <i>arcana</i>   | 27.10.2015 | Czech Republic         | PRM 934861          | n.a.               | May 2016   |
| PS-12 | <i>Psilocybe serbica</i>                      | 27.10.2015 | Bosnia and Herzegovina | PRM 934969          | n.a.               | May 2016   |
| PS-13 | <i>Pluteus salicinus</i>                      | 21.07.2012 | Sweden                 | -                   | n.a.               | May 2016   |
| PS-14 | <i>Psilocybe semilanceata</i>                 | 26.09.2015 | Sweden                 | PRM 935886          | n.a.               | May 2016   |
| PS-15 | <i>Panaeolus cinctulus</i>                    | 27.08.2008 | Sweden                 | PRM 935887          | n.a.               | May 2016   |
| PS-16 | <i>Psilocybe medullosa</i>                    | 02.09.2011 | Sweden                 | PRM 935889          | n.a.               | May 2016   |
| PS-17 | <i>Pholiotina cyanopus</i>                    | 23.09.2015 | Sweden                 | PRM 935888          | n.a.               | May 2016   |
| PS-19 | <i>Psilocybe medullosa</i>                    | 08.11.2015 | Czech Republic         | PRM 934957          | n.a.               | May 2016   |
| PS-20 | <i>Psilocybe ovoideocystidiata</i>            | 01.12.2015 | Maryland, USA          | (PRM 934866)        | n.a.               | May 2016   |
| PS-21 | <i>Psilocybe</i> sp.                          | 29.01.2016 | Australia              | PRM 951401          | MN901951           | May 2016   |
| PS-23 | <i>Psilocybe serbica</i> var. <i>bohemica</i> | 05.11.2016 | Czech Republic         | -                   | n.a.               | Sep. 2017  |
| PS-26 | <i>Psilocybe serbica</i> var. <i>moravica</i> | 31.10.2016 | Czech Republic         | (PRM 860954)        | n.a.               | Sep. 2017  |
| PS-30 | <i>Psilocybe ovoideocystidiata</i>            | 25.05.2016 | Virginia, USA          | PRM 945683          | n.a.               | Sep. 2017  |
| PS-31 | <i>Panaeolina foenisecii</i>                  | 08.06.2016 | Czech Republic         | -                   | n.a.               | Sep. 2017  |
| PS-33 | <i>Inocybe corydalina</i>                     | 18.08.2016 | Czech Republic         | HR 103893           | n.a.               | Sep. 2017  |
| PS-42 | <i>Pluteus glaucotinctus</i>                  | 08.11.2015 | Martinique             | V. Antonín VA15.243 | MN901948           | Sep. 2017  |
| PS-43 | <i>Psilocybe fimetaria</i>                    | Nov. 2016  | France                 | PRM 945733          | n.a.               | Sep. 2017  |
| PS-44 | <i>Inocybe aeruginascens</i>                  | 8.6.2013   | Hungary                | B. Dima BD5076      | n.a.               | April 2018 |
| PS-45 | <i>Gymnopilus dilepis</i>                     | 15.6.2017  | Malaysia               | PRM 946008          | MN901949, MN900720 | April 2018 |
| PS-46 | <i>Psilocybe fuscofulva</i>                   | 19.9.2017  | Czech Republic         | PRM 945880          | n.a.               | April 2018 |
| PS-47 | <i>Psilocybe fuscofulva</i>                   | 20.9.2017  | Czech Republic         | PRM 945859          | n.a.               | April 2018 |
| PS-48 | <i>Pluteus salicinus</i>                      | 07.10.2017 | Czech Republic         | PRM 945836          | n.a.               | April 2018 |
| PS-50 | <i>Psilocybe caerulescens</i>                 | 11.08.2016 | Mexico                 | -                   | MN901952           | April 2018 |
| PS-51 | <i>Psilocybe zapotecorum</i>                  | 09.07.2016 | Mexico                 | -                   | MN901953           | April 2018 |
| PS-52 | <i>Psilocybe mexicana</i>                     | 18.07.2016 | Mexico                 | -                   | MN901954           | April 2018 |
| PS-53 | <i>Pluteus americanus</i>                     | 26.10.2017 | Detroit, USA           | PRM 946472          | MN901950           | April 2018 |
| PS-54 | <i>Pluteus americanus</i>                     | 26.10.2017 | Detroit, USA           | (PRM 946472)        | n.a.               | April 2018 |
| PS-55 | <i>Psilocybe caerulipes</i>                   | 08.09.2017 | Detroit, USA           | -                   | n.a.               | April 2018 |
| PS-56 | <i>Pluteus americanus</i>                     | 22.09.2017 | Kentucky, USA          | PRM 946474          | n.a.               | April 2018 |

|        |                                               |            |                |            |                    |            |
|--------|-----------------------------------------------|------------|----------------|------------|--------------------|------------|
| PS-57  | <i>Psilocybe caeruleipes</i>                  | 12.09.2017 | Kentucky, USA  | PRM 946475 | n.a.               | April 2018 |
| PS-58  | <i>Psilocybe ovoideocystidiata</i>            | 06.03.2017 | Kentucky, USA  | PRM 946476 | n.a.               | April 2018 |
| PS-59  | <i>Psilocybe semilanceata</i>                 | 01.11.2018 | Czech Republic | PRM 951339 | n.a.               | April 2019 |
| PS-60  | <i>Psilocybe fuscofulva</i>                   | 26.09.2018 | Czech Republic | PRM 951350 | n.a.               | April 2019 |
| PS-63  | <i>Psilocybe serbica</i> var. <i>bohémica</i> | 17.11.2018 | Czech Republic | -          | n.a.               | April 2019 |
| PS-64  | <i>Psilocybe serbica</i> var. <i>bohémica</i> | 18.11.2018 | Czech Republic | PRM 951316 | n.a.               | April 2019 |
| PS-65  | <i>Psilocybe fimetaria</i>                    | 03.11.2018 | Czech Republic | PRM 951396 | MN901955, LR760712 | April 2019 |
| PS-66a | <i>Inocybe calamistrata</i>                   | 06.10.2018 | Czech Republic | PRM 952106 | n.a.               | April 2019 |
| PS-66b | <i>Inocybe calamistrata</i>                   | 06.10.2018 | Czech Republic | PRM 952106 | n.a.               | April 2019 |
| PS-67  | <i>Inocybe corydalina</i>                     | 31.08.2010 | Czech Republic | PRM 899248 | n.a.               | April 2019 |
| PS-68  | <i>Inocybe calamistrata</i>                   | 10.10.2013 | Czech Republic | PRM 923127 | n.a.               | April 2019 |
| PS-69  | <i>Inocybe calamistrata</i>                   | 12.09.2013 | Czech Republic | PRM 922987 | n.a.               | April 2019 |
| PS-70  | <i>Psilocybe serbica</i> var. <i>arcana</i>   | 14.11.2018 | Germany        | PRM 952111 | n.a.               | April 2019 |
| L-05   | <i>Psilocybe serbica</i> var. <i>arcana</i>   | 08.11.2015 | Czech Republic | PRM 952706 | n.a.               | May 2016   |
| L-06   | <i>Psilocybe serbica</i> var. <i>arcana</i>   | 17.10.2015 | Czech Republic | PRM 952707 | n.a.               | May 2016   |
| L-07   | <i>Psilocybe serbica</i> var. <i>arcana</i>   | 24.10.2015 | Czech Republic | PRM 952708 | n.a.               | May 2016   |
| L-08   | <i>Psilocybe cyanescens</i>                   | 31.10.2015 | Czech Republic | PRM 952709 | n.a.               | May 2016   |
| L-09   | <i>Psilocybe cubensis</i>                     | March 2016 | cultivation    | -          | n.a.               | May 2016   |
| L-10   | <i>Psilocybe semilanceata</i>                 | 26.09.2015 | Czech Republic | PRM 952710 | n.a.               | May 2016   |
| L-12   | <i>Psilocybe cubensis</i>                     | April 2014 | cultivation    | PRM 952711 | n.a.               | May 2016   |
| L-13   | <i>Psilocybe serbica</i> var. <i>arcana</i>   | May 2014   | Czech Republic | -          | n.a.               | May 2016   |
| H-01   | <i>Psilocybe cyanescens</i>                   | 21.10.2016 | Czech Republic | PRM 952704 | n.a.               | Sep. 2017  |
| H-02   | <i>Psilocybe cyanescens</i>                   | 26.10.2016 | Czech Republic | PRM 952704 | n.a.               | Sep. 2017  |
| H-03   | <i>Psilocybe serbica</i> var. <i>arcana</i>   | 26.10.2016 | Czech Republic | PRM 952691 | n.a.               | Sep. 2017  |
| H-04   | <i>Psilocybe serbica</i> var. <i>arcana</i>   | 27.10.2016 | Czech Republic | PRM 934295 | n.a.               | Sep. 2017  |
| H-05   | <i>Psilocybe serbica</i> var. <i>arcana</i>   | 28.10.2016 | Czech Republic | PRM 952692 | n.a.               | Sep. 2017  |
| H-06   | <i>Psilocybe serbica</i> var. <i>arcana</i>   | 28.10.2016 | Czech Republic | PRM 952693 | n.a.               | Sep. 2017  |
| H-07   | <i>Psilocybe serbica</i> var. <i>arcana</i>   | 28.10.2016 | Czech Republic | PRM 952694 | n.a.               | Sep. 2017  |
| H-08   | <i>Psilocybe serbica</i> var. <i>arcana</i>   | 28.10.2016 | Czech Republic | PRM 952695 | n.a.               | Sep. 2017  |
| H-09   | <i>Psilocybe serbica</i> var. <i>arcana</i>   | 30.10.2016 | Czech Republic | PRM 952696 | n.a.               | Sep. 2017  |
| H-10   | <i>Psilocybe serbica</i> var. <i>arcana</i>   | 04.11.2016 | Czech Republic | PRM 952705 | n.a.               | Sep. 2017  |
| H-11   | <i>Psilocybe serbica</i> var. <i>arcana</i>   | 04.11.2016 | Czech Republic | PRM 952705 | n.a.               | Sep. 2017  |
| H-12   | <i>Psilocybe serbica</i> var. <i>bohémica</i> | 23.12.2016 | Czech Republic | PRM 946005 | n.a.               | Sep. 2017  |
| H-13   | <i>Psilocybe semilanceata</i>                 | 16.09.2016 | Czech Republic | PRM 952697 | n.a.               | April 2018 |
| H-14   | <i>Psilocybe semilanceata</i>                 | 30.09.2016 | Czech Republic | PRM 952698 | n.a.               | April 2018 |
| H-15   | <i>Psilocybe serbica</i> var. <i>arcana</i>   | 28.10.2016 | Czech Republic | PRM 952699 | n.a.               | April 2018 |
| H-16   | <i>Psilocybe serbica</i> var. <i>arcana</i>   | 04.11.2016 | Czech Republic | PRM 952700 | n.a.               | April 2018 |
| H-17   | <i>Psilocybe serbica</i> var. <i>arcana</i>   | 04.11.2016 | Czech Republic | PRM 952701 | n.a.               | April 2018 |
| H-18   | <i>Psilocybe serbica</i> var. <i>bohémica</i> | 04.11.2016 | Czech Republic | PRM 952702 | n.a.               | April 2018 |
| H-19   | <i>Psilocybe medullosa</i>                    | 04.11.2016 | Czech Republic | PRM 952703 | n.a.               | April 2018 |
| H-20   | <i>Psilocybe cubensis</i>                     | 27.01.2017 | cultivation    | -          | n.a.               | April 2018 |

|                  |                                               |            |                |            |      |                 |
|------------------|-----------------------------------------------|------------|----------------|------------|------|-----------------|
| H-21             | <i>Psilocybe cubensis</i>                     | 24.02.2017 | cultivation    | -          | n.a. | April 2018      |
| H-22             | <i>Psilocybe serbica</i> var. <i>bohémica</i> | 05.12.2017 | Czech Republic | -          | n.a. | April 2018      |
| H-23             | <i>Psilocybe serbica</i> var. <i>bohémica</i> | 06.12.2017 | Czech Republic | -          | n.a. | April 2018      |
| Negative control |                                               |            |                |            |      |                 |
| -                | <i>Stropharia aeruginosa</i>                  | 25.10.2016 | Czech Republic | PRM 945622 | n.a. | throu-<br>ghout |

\*day.month.year

**Supplementary Table S2.** Scientific names of mushroom species investigated in this study.

| Mushroom species (according to Index Fungorum*)                                                                                                                                           | Family                | Important synonyms                                                                                                  |
|-------------------------------------------------------------------------------------------------------------------------------------------------------------------------------------------|-----------------------|---------------------------------------------------------------------------------------------------------------------|
| <i>Agaricus bisporus</i> (J.E. Lange) Imbach, Mitt. naturf. Ges. Luzern 15: 15 (1946)                                                                                                     | <i>Agaricaceae</i>    |                                                                                                                     |
| <i>Gymnopilus dilepis</i> (Berk. & Broome) Singer, Lilloa 22: 560 (1951) [1949]                                                                                                           | <i>Strophariaceae</i> |                                                                                                                     |
| <i>Inocybe aeruginascens</i> Babos, Fragm. Bot. Mus. Hist.-Nat. Hung. 6(1-6): 21 (1968)                                                                                                   | <i>Crepidotaceae</i>  |                                                                                                                     |
| <i>Inocybe calamistrata</i> (Fr.) Gillet, Hyménomycètes (Alençon): 513 (1876) [1878]                                                                                                      | <i>Crepidotaceae</i>  | <i>Inosperma calamistratum</i> (Fr.) Matheny & Esteve-Rav.                                                          |
| <i>Inocybe corydalina</i> Quél., Mém. Soc. Émul. Montbéliard, Sér. 2 5: 543 (1875)                                                                                                        | <i>Crepidotaceae</i>  |                                                                                                                     |
| <i>Panaeolina foenicisii</i> (Pers.) Maire, Treb. Mus. Ciènc. nat. Barcelona, sér. bot. 15(no. 2): 109 (1933)                                                                             | <i>Strophariaceae</i> |                                                                                                                     |
| <i>Panaeolus cinctulus</i> (Bolton) Sacc., Syll. fung. (Abellini) 5: 1124 (1887)                                                                                                          | <i>Strophariaceae</i> | <i>Panaeolus subbalteatus</i> (Berk. & Broome) Sacc.                                                                |
| <i>Panaeolus olivaceus</i> F.H. Møller, Fungi of the Faeröes, Part I: Basidiomyceten: 171 (1945)                                                                                          | <i>Strophariaceae</i> |                                                                                                                     |
| <i>Panaeolus papilionaceus</i> (Bull.) Quél., Mém. Soc. Émul. Montbéliard, Sér. 2 5: 152 [122 repr.] (1872)                                                                               | <i>Strophariaceae</i> |                                                                                                                     |
| <i>Pholiotina cyanopus</i> (G.F. Atk.) Singer, Trudy Bot. Inst. Akad. Nauk SSSR, ser. 2, Sporov. Rast. 6: 425 (1950)                                                                      | <i>Bolbitiaceae</i>   | <i>Conocybe cyanopus</i> (G.F. Atk.) Kühner                                                                         |
| <i>Pluteus americanus</i> (P. Banerjee & Sundb.) Justo, E.F. Malysheva & Minnis, in Justo, Malysheva, Bulyonkova, Vellinga, Cobian, Nguyen, Minnis & Hibbett, Phytotaxa 180(1): 62 (2014) | <i>Pluteaceae</i>     |                                                                                                                     |
| <i>Pluteus glaucotinctus</i> E. Horak, Bull. Jard. Bot. natn. Belg. 47(1-2): 88 (1977)                                                                                                    | <i>Pluteaceae</i>     |                                                                                                                     |
| <i>Pluteus salicinus</i> (Pers.) P. Kumm., Führ. Pilzk. (Zerbst): 99 (1871)                                                                                                               | <i>Pluteaceae</i>     |                                                                                                                     |
| <i>Psilocybe caerulescens</i> Murrill, Mycologia 15(1): 20 (1923)                                                                                                                         | <i>Strophariaceae</i> | <i>Psilocybe weilii</i> Guzmán, Stamets & F. Tapia, <i>Psilocybe mazatecorum</i> R. Heim                            |
| <i>Psilocybe caerulipes</i> (Peck) Sacc., Syll. fung. (Abellini) 5: 1051 (1887)                                                                                                           | <i>Strophariaceae</i> |                                                                                                                     |
| <i>Psilocybe tasmaniana</i> Guzmán & Watling, Notes R. bot. Gdn Edinb. 36(1): 207 (1978)                                                                                                  | <i>Strophariaceae</i> |                                                                                                                     |
| <i>Psilocybe cubensis</i> (Earle) Singer, Sydowia 2(1-6): 37 (1948)                                                                                                                       | <i>Strophariaceae</i> | <i>Stropharia cubensis</i> Earle                                                                                    |
| <i>Psilocybe cyanescens</i> Wakef., Trans. Br. mycol. Soc. 29(3): 141 (1946)                                                                                                              | <i>Strophariaceae</i> |                                                                                                                     |
| <i>Psilocybe fimetaria</i> (P.D. Orton) Watling, Lloydia 30: 150 (1967)                                                                                                                   | <i>Strophariaceae</i> |                                                                                                                     |
| <i>Psilocybe fuscofulva</i> Peck, Bull. N.Y. St. Mus. nat. Hist. 1(no. 2): 7 (1887)                                                                                                       | <i>Strophariaceae</i> | <i>Psilocybe atrobrunnea</i> (Lasch) Gillet sensu Guzmán, sensu auct.; <i>Psilocybe turficola</i> Favre nom. inval. |
| <i>Psilocybe medullosa</i> (Bres.) Borovička, C.C.H. 84(4): 114 (2007)                                                                                                                    | <i>Strophariaceae</i> | <i>Phaeogalera medullosa</i> (Bres.) M.M. Moser, <i>Psilocybe tenax</i> s. auct.                                    |

|                                                                                                                                                                           |                       |                                              |
|---------------------------------------------------------------------------------------------------------------------------------------------------------------------------|-----------------------|----------------------------------------------|
| <i>Psilocybe mexicana</i> R. Heim, Revue Mycol., Paris 22(1): 77 (1957)                                                                                                   | <i>Strophariaceae</i> |                                              |
| <i>Psilocybe ovoideocystidiata</i> Guzmán & Gaines, International Journal of Medicinal Mushrooms (Redding) 9(1): 75 (2007)                                                | <i>Strophariaceae</i> |                                              |
| <i>Psilocybe semilanceata</i> (Fr.) P. Kumm., Führ. Pilzk. (Zerbst): 71 (1871)                                                                                            | <i>Strophariaceae</i> |                                              |
| <i>Psilocybe serbica</i> M.M. Moser & E. Horak, Z. Pilzk. 34(3-4): 138 (1969) [1968]                                                                                      | <i>Strophariaceae</i> |                                              |
| <i>Psilocybe serbica</i> var. <i>arcana</i> (Borov. & Hlaváček) Borov., Oborník & Noordel., in Borovička, Noordeloos, Gryndler & Oborník, Mycol. Progr. 10(2): 153 (2011) | <i>Strophariaceae</i> | <i>Psilocybe arcana</i> Borovička & Hlaváček |
| <i>Psilocybe serbica</i> var. <i>bohemica</i> (Šebek) Borov., Oborník & Noordel., in Borovička, Noordeloos, Gryndler & Oborník, Mycol. Progr. 10(2): 153 (2011)           | <i>Strophariaceae</i> | <i>Psilocybe bohemica</i> Šebek ex Šebek     |
| <i>Psilocybe serbica</i> var. <i>moravica</i> (Borov.) Borov., Oborník & Noordel., in Borovička, Noordeloos, Gryndler & Oborník, Mycol. Progr. 10(2): 153 (2011)          | <i>Strophariaceae</i> | <i>Psilocybe moravica</i> Borovička          |
| <i>Psilocybe subaeruginosa</i> Cleland, Trans. Roy. Soc. S. Australia 51: 305 (1927)                                                                                      | <i>Strophariaceae</i> |                                              |
| <i>Psilocybe zapotecorum</i> R. Heim, Revue Mycol., Paris 22(1): 77 (1957)                                                                                                | <i>Strophariaceae</i> |                                              |
| <i>Stropharia aeruginosa</i> (Curtis) Quél., Mém. Soc. Émul. Montbéliard, Sér. 2 5: 141 (1872)                                                                            | <i>Strophariaceae</i> |                                              |

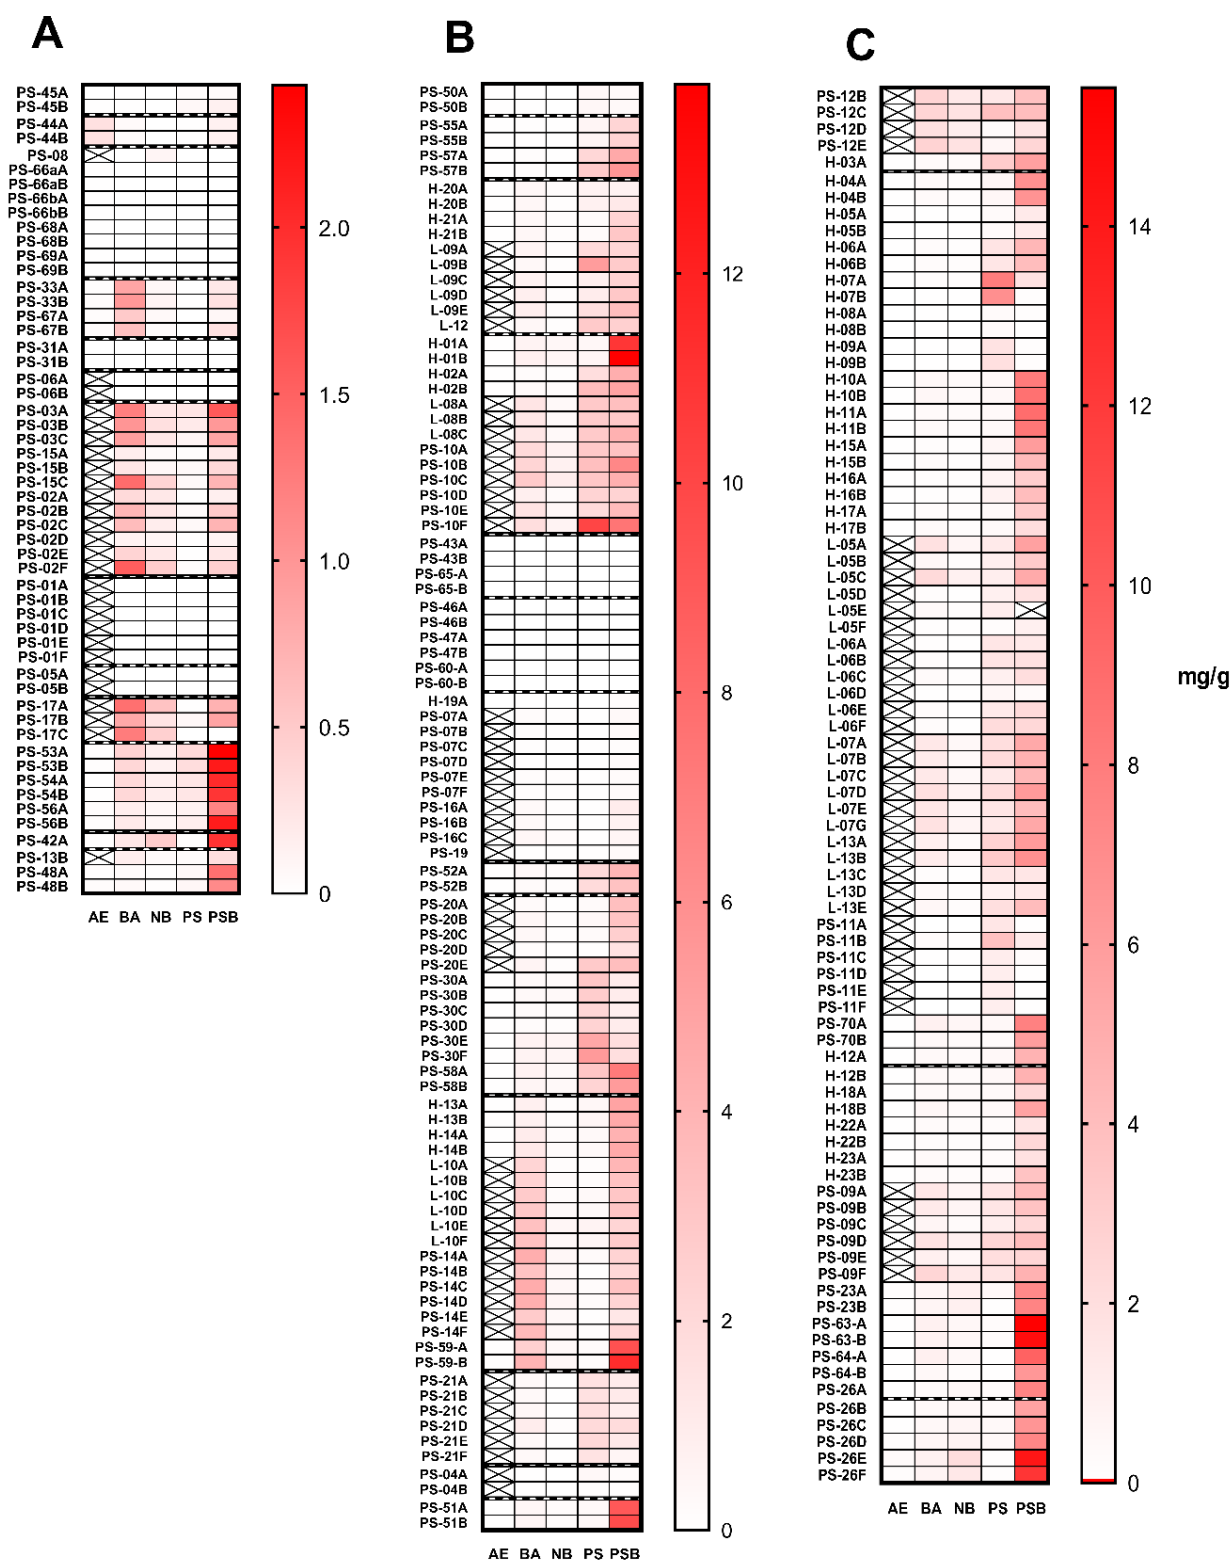

**Supplementary Figure S1.** Tryptamine concentrations in analyzed mushrooms (mg/g in dry mass) presented in heatmaps. Mushroom species are separated by dashed lines. (A) Non-*Psilocybe* genera. (B) *Psilocybe* species excluding *P. sebica* complex. (C) *P. sebica* complex.
